# Supplementary material for: Homeostatic status of thyroid hormones and brain water movement as determinant factors in biology of cerebral gliomas: a pilot study using a bioinformatics approach
Source: Front Neurosci. 2024 Feb 27;18:1349421. doi: 10.3389/fnins.2024.1349421 (PMC10927765; doi:10.3389/fnins.2024.1349421)
Supplement: Supplementary file 4 [file Table_1.XLSX]

## Sheet: GBM Up_regulated from DAVID
Category	Term	Count	%	PValue	Genes	List Total	Pop Hits	Pop Total	Fold Enrichment	Bonferroni	Benjamini	FDR
KEGG_PATHWAY	hsa05150:Staphylococcus aureus infection	37	1.71138e+16	1.826e-05	C1QB, C1QA, SELPLG, ITGAM, C1R, C5AR1, PTAFR, CFI, ITGB2, FPR1, FPR3, ITGAL, C2, ICAM1, C3, C4B, C4A, HLA-DMA, FCGR3A, HLA-DMB, FCGR3B, C3AR1, FCGR1A, HLA-DOA, HLA-DQA2, HLA-DQA1, HLA-DPA1, IL10, HLA-DRB5, FCGR2A, HLA-DPB1, HLA-DRA, MASP1, FCGR2B, HLA-DRB1, C1QC, HLA-DQB1	809	54	6879	5826191457217410	0.000502149	0.000502149	0.000421805
KEGG_PATHWAY	hsa05166:HTLV-I infection	69	3.19149e+16	168378	RB1, CDKN1A, SPI1, ITGB2, BUB1B, TNFRSF13C, CD3E, ITGAL, ETS1, TNF, PIK3CG, ICAM1, CDC20, CCND2, PTTG1, MYC, CHEK2, CHEK1, TSPO, HLA-DOA, HLA-DPA1, PDGFRA, MSX2, WNT5A, HLA-B, WNT9B, HLA-C, HLA-A, HLA-G, TGFBR1, HLA-E, TNFRSF1A, LCK, TP53, HLA-DQB1, PCNA, RELB, PIK3R5, HLA-DMA, HLA-DMB, POLD1, TP53INP1, POLD2, E2F2, MSX1, HLA-DQA2, HLA-DQA1, EGR1, CDKN2B, EGR2, HLA-DRB5, TGFB1, CDKN2C, FZD2, VCAM…	809	254	6879	2309894591359020	4.63038e+06	2.31519e+07	1.94476e+06
KEGG_PATHWAY	hsa04514:Cell adhesion molecules (CAMs)	47	2.17391e+16	37134.1	NLGN3, CD86, NLGN1, SELPLG, ITGAM, SDC3, ITGB2, ITGAL, ICAM1, SPN, HLA-DMA, ALCAM, HLA-DMB, CDH2, ITGB8, ITGAV, TIGIT, HLA-DOA, HLA-DQA2, CD99, HLA-DQA1, MPZL1, JAM2, HLA-DPA1, CD276, HLA-DRB5, VCAM1, HLA-B, HLA-C, HLA-A, PDCD1LG2, HLA-G, HLA-E, CD2, CD4, VCAN, PTPRC, CD40LG, SELL, CLDN7, HLA-DPB1, SDC1, HLA-DRA, SIGLEC1, HLA-DRB1, NECTIN2, HLA-DQB1	809	142	6879	2.8144e+16	1.02119e+08	3.40396e+07	2.85933e+06
KEGG_PATHWAY	hsa05140:Leishmaniasis	31	1.43386e+16	62440.1	ITGAM, NCF1, NCF2, NCF4, ITGB2, TNF, C3, HLA-DMA, FCGR3A, HLA-DMB, FCGR3B, IRAK1, FCGR1A, HLA-DOA, HLA-DQA2, HLA-DQA1, HLA-DPA1, IL10, MARCKSL1, HLA-DRB5, TGFB1, CYBA, IL1A, FCGR2A, IL1B, HLA-DPB1, HLA-DRA, PTPN6, HLA-DRB1, HLA-DQB1, TLR2	809	71	6879	3712616863106940	1.7171e+07	4.29276e+06	3.60592e+07
KEGG_PATHWAY	hsa05332:Graft-versus-host disease	20	0.925069	2.86141e+06	CD86, HLA-DRB5, HLA-B, HLA-C, HLA-A, TNF, HLA-G, HLA-E, IL1A, HLA-DMA, HLA-DMB, IL1B, HLA-DPB1, HLA-DRA, HLA-DOA, HLA-DQA2, HLA-DQA1, HLA-DRB1, HLA-DPA1, HLA-DQB1	809	33	6879	5153388021125960	7.86889e+07	1.36884e+08	1.14983e+08
KEGG_PATHWAY	hsa04145:Phagosome	47	2.17391e+16	2.98656e+06	ITGAM, NCF1, C1R, NCF2, NCF4, ITGB2, THBS2, CTSS, C3, MRC2, SEC61A1, TUBA1C, HLA-DMA, FCGR3A, HLA-DMB, FCGR3B, SEC61G, MRC1, OLR1, ITGAV, CD14, FCGR1A, HLA-DOA, HLA-DQA2, HLA-DQA1, HLA-DPA1, MSR1, HLA-DRB5, ATP6V0E1, HLA-B, HLA-C, TAP1, CYBA, HLA-A, HLA-G, HLA-E, FCGR2A, HLA-DPB1, HLA-DRA, TLR6, CALR, RAB7B, FCGR2B, HLA-DRB1, ATP6V1B1, HLA-DQB1, TLR2	809	150	6879	2.6643e+16	8.21305e+07	1.36884e+08	1.14983e+08
KEGG_PATHWAY	hsa04110:Cell cycle	41	1.89639e+16	833807	RB1, CDKN1A, PCNA, BUB1B, TTK, CDC20, CCNB2, CCNB1, CDC45, CCND2, ORC1, PTTG1, CHEK2, MYC, CHEK1, E2F2, BUB1, CDKN2B, TGFB1, CDKN2C, CDKN2A, CDC6, CDC25C, CDC25A, GADD45G, WEE1, WEE2, RBL1, DBF4, CDK6, ESPL1, CDK4, CDK2, MCM3, CDK1, MCM4, MCM5, MCM6, TP53, MCM2, MAD2L1	809	124	6879	281150564217074	2.29297e+09	3.27567e+07	2.75156e+08
KEGG_PATHWAY	hsa04612:Antigen processing and presentation	30	1.3876e+16	235256	IFI30, TNF, CTSS, HLA-DMA, HLA-DMB, KLRC1, HLA-DOA, HLA-DQA2, B2M, HLA-DQA1, HLA-DPA1, CD74, HLA-DRB5, KLRC2, KLRC3, KLRC4, HLA-B, HLA-C, TAP1, RFXANK, HLA-A, HLA-G, HLA-E, CD4, HLA-DPB1, HLA-DRA, CALR, HLA-DRB1, LGMN, HLA-DQB1	809	76	6879	3.35648e+16	6.46953e+08	8.08692e+06	6.79301e+07
KEGG_PATHWAY	hsa05330:Allograft rejection	20	0.925069	3.89353e+06	IL10, CD86, HLA-DRB5, HLA-B, HLA-C, HLA-A, TNF, HLA-G, HLA-E, HLA-DMA, HLA-DMB, CD40LG, HLA-DPB1, HLA-DRA, HLA-DOA, HLA-DQA2, HLA-DQA1, HLA-DRB1, HLA-DPA1, HLA-DQB1	809	37	6879	4596264991815050	1.07072e+10	1.18969e+09	9.99341e+07
KEGG_PATHWAY	hsa05152:Tuberculosis	48	2.22017e+16	3.37376e+07	ITGAM, ITGB2, LSP1, NOD2, TNF, CTSS, C3, MRC2, CYP27B1, HLA-DMA, FCGR3A, HLA-DMB, FCGR3B, IRAK1, MRC1, FADD, CD14, FCGR1A, HLA-DOA, CTSD, HLA-DQA2, HLA-DQA1, HLA-DPA1, IL10, CD74, HLA-DRB5, TGFB1, FCER1G, SYK, RIPK2, IL10RA, SPHK1, IL18, RFXANK, TNFRSF1A, TLR1, IL1A, FCGR2A, IL1B, HLA-DPB1, BAX, HLA-DRA, TLR6, CLEC4E, FCGR2B, HLA-DRB1, HLA-DQB1, TLR2	809	177	6879	2305922775554670	9.27781e+09	9.27785e+08	7.79339e+07
KEGG_PATHWAY	hsa04940:Type I diabetes mellitus	20	0.925069	5.53315e+07	CD86, HLA-DRB5, HLA-B, HLA-C, HLA-A, TNF, HLA-G, HLA-E, IL1A, HLA-DMA, HLA-DMB, IL1B, HLA-DPB1, HLA-DRA, HLA-DOA, HLA-DQA2, HLA-DQA1, HLA-DRB1, HLA-DPA1, HLA-DQB1	809	42	6879	4049090588027540	1.5216e+11	1.22056e+10	1.02527e+10
KEGG_PATHWAY	hsa04060:Cytokine-cytokine receptor interaction	59	272895467160037	5.54899e+07	CXCL9, CSF1, CCL4L2, TNFRSF13C, IL1RAP, CXCL13, CXCL3, TNF, EDA2R, TNFSF13B, CXCL16, TNFRSF8, CCR5, CCR2, IL13RA1, IL10, TNFRSF12A, TNFRSF19, IL18, LIFR, TNFRSF1B, TGFBR1, TNFRSF1A, IL1A, IL1B, TNFRSF21, CX3CR1, CSF1R, CXCR4, CSF2RB, CSF2RA, CCL8, CCL5, CCL4, CCL3, CCL2, IL12RB1, CCL18, TNFSF18, CCR1, NGFR, TGFB1, CCL20, IL10RA, LIF, OSM, TNFRSF10C, INHBB, GDF5, BMP7, CXCL10, BMP2, CD40LG, IL2RA,…	809	243	6879	2064536312167130	1.52596e+10	1.22056e+10	1.02527e+10
KEGG_PATHWAY	hsa04380:Osteoclast differentiation	39	1.80389e+16	5.76993e+07	CSF1R, SPI1, CSF1, NCF1, NCF2, NCF4, TREM2, LILRA1, LILRA2, TNF, PIK3CG, LILRA4, RELB, PIK3R5, FCGR3A, FCGR3B, BLNK, ACP5, FCGR1A, TGFB1, SYK, CYBB, NFATC2, LILRB1, CYBA, LILRB2, LILRB4, TGFBR1, TNFRSF1A, OSCAR, FOSL1, IL1A, TYROBP, FCGR2A, LCK, IL1B, BTK, LCP2, FCGR2B	809	131	6879	2.53145e+16	1.58672e+11	1.22056e+10	1.02527e+10
KEGG_PATHWAY	hsa05323:Rheumatoid arthritis	30	1.3876e+16	1.06958e+09	CD86, CSF1, ITGB2, ITGAL, TNF, TNFSF13B, ICAM1, HLA-DMA, HLA-DMB, CCL5, CCL3, CCL2, ACP5, HLA-DOA, HLA-DQA2, HLA-DQA1, HLA-DPA1, HLA-DRB5, TGFB1, ATP6V0E1, CCL20, IL18, IL1A, IL1B, HLA-DPB1, HLA-DRA, HLA-DRB1, ATP6V1B1, HLA-DQB1, TLR2	809	88	6879	2.89878e+16	2.94129e+11	2.10096e+10	1.7648e+10
KEGG_PATHWAY	hsa05416:Viral myocarditis	23	1.06383e+16	1.61514e+09	CD86, HLA-DRB5, ITGB2, HLA-B, HLA-C, HLA-A, ITGAL, HLA-G, ICAM1, HLA-E, HLA-DMA, HLA-DMB, CD40LG, DAG1, HLA-DPB1, RAC2, HLA-DRA, HLA-DOA, HLA-DQA2, HLA-DQA1, HLA-DRB1, HLA-DPA1, HLA-DQB1	809	57	6879	3431071498275970	4.44155e+10	2.9611e+10	2.48732e+09
KEGG_PATHWAY	hsa05310:Asthma	16	0.740056	2.78011e+09	IL10, HLA-DRB5, FCER1G, RNASE3, TNF, HLA-DMA, HLA-DMB, CD40LG, HLA-DPB1, HLA-DRA, HLA-DOA, HLA-DQA2, HLA-DQA1, HLA-DRB1, HLA-DPA1, HLA-DQB1	809	30	6879	4.53498e+16	7.64502e+10	4.77832e+09	4.01379e+09
KEGG_PATHWAY	hsa05320:Autoimmune thyroid disease	20	0.925069	2.9957e+10	IL10, CD86, HLA-DRB5, HLA-B, HLA-C, HLA-A, HLA-G, TSHR, HLA-E, HLA-DMA, HLA-DMB, CD40LG, HLA-DPB1, HLA-DRA, HLA-DOA, HLA-DQA2, HLA-DQA1, HLA-DRB1, HLA-DPA1, HLA-DQB1	809	52	6879	3270419321099170	8.23478e+11	4.84598e+10	4.07062e+09
KEGG_PATHWAY	hsa04672:Intestinal immune network for IgA production	18	0.832562	1.1639e+11	IL10, CD86, HLA-DRB5, TGFB1, CXCR4, TNFRSF13C, TNFSF13B, HLA-DMA, HLA-DMB, CD40LG, HLA-DPB1, HLA-DRA, HLA-DOA, HLA-DQA2, HLA-DQA1, HLA-DRB1, HLA-DPA1, HLA-DQB1	809	47	6879	3.2565e+16	0.00319562	1.77818e+12	1.49367e+12
KEGG_PATHWAY	hsa04640:Hematopoietic cell lineage	26	1.20259e+16	1.29953e+11	CSF1R, ITGAM, CSF1, CD1D, CD3E, TNF, CSF2RA, CD38, CD37, CD14, FCGR1A, CD33, HLA-DRB5, FLT3LG, CD2, IL1A, CD4, IL1B, IL2RA, CD7, CD9, HLA-DRA, CD24, IL7R, CD44, HLA-DRB1	809	87	6879	2.54115e+16	0.00356734	1.88089e+11	1.57995e+11
KEGG_PATHWAY	hsa04115:p53 signaling pathway	22	1.01758e+16	1.48341e+11	CDKN1A, STEAP3, RRM2, CD82, CDKN2A, IGFBP3, SERPINE1, GADD45G, CCNB2, CCNB1, TP53I3, CDK6, CCND2, CDK4, CHEK2, CHEK1, CDK2, CDK1, BAX, TP53, GTSE1, RPRM	809	67	6879	2.79206e+16	0.0040711	2.03969e+12	1.71334e+12
KEGG_PATHWAY	hsa05144:Malaria	18	0.832562	2.19665e+10	IL10, TGFB1, VCAM1, KLRB1, GYPC, CD81, ITGB2, IL18, ITGAL, THBS2, TNF, ICAM1, KLRK1, CD40LG, IL1B, CCL2, SDC1, TLR2	809	49	6879	3.12358e+16	0.00602265	2.87657e+11	2.41632e+12
KEGG_PATHWAY	hsa05321:Inflammatory bowel disease (IBD)	21	0.971323	2.48189e+11	IL10, HLA-DRB5, TGFB1, IL18, NOD2, TNF, IL1A, HLA-DMA, HLA-DMB, IL1B, HLA-DPB1, HLA-DRA, HLA-DOA, IL12RB1, TLR5, HLA-DQA2, HLA-DQA1, HLA-DRB1, HLA-DPA1, HLA-DQB1, TLR2	809	64	6879	2.79008e+16	0.00680205	3.10236e+11	2.60599e+12
KEGG_PATHWAY	hsa04610:Complement and coagulation cascades	21	0.971323	8.24738e+10	C1QB, C1QA, SERPINA1, C1R, PROS1, CFI, F2R, C5AR1, SERPINE1, TFPI, F5, C2, C3, C4B, C4A, PLAU, C9, C3AR1, MASP1, A2M, C1QC	809	69	6879	2587897028000210	0.022426	9.861e+11	8.28324e+11
KEGG_PATHWAY	hsa03030:DNA replication	14	0.647549	1.27691e+12	PRIM2, FEN1, RNASEH2A, PCNA, RFC2, PRIM1, POLD1, POLE2, POLD2, MCM3, MCM4, MCM5, MCM6, MCM2	809	36	6879	330675731355583	0.0345078	0.00145703	0.0012239
KEGG_PATHWAY	hsa05169:Epstein-Barr virus infection	30	1.3876e+16	1.32457e+12	RB1, CDKN1A, ITGAL, PIK3CG, RELB, PIK3R5, ICAM1, SPN, IRAK1, MYC, HLA-DQA2, HLA-DQA1, HLA-DPA1, LYN, HLA-DRB5, SYK, HLA-B, HLA-C, HLA-A, HLA-G, HLA-E, NEDD4, CDK2, HLA-DPB1, HLA-DRA, VIM, TP53, CD44, HLA-DRB1, HLA-DQB1	809	122	6879	2.09092e+16	0.0357726	0.00145703	0.0012239
KEGG_PATHWAY	hsa05133:Pertussis	21	0.971323	2.88431e+11	IL10, C1QB, C1QA, ITGAM, C1R, ITGB2, LY96, TNF, C2, GNAI2, C3, C4B, PYCARD, IL1A, C4A, IRAK1, IL1B, CASP1, IRF8, CD14, C1QC	809	75	6879	2380865265760190	0.0762648	0.00305071	0.00256259
KEGG_PATHWAY	hsa04666:Fc gamma R-mediated phagocytosis	22	1.01758e+16	5.32956e+11	LYN, MARCKSL1, SYK, MYO10, NCF1, SPHK1, ARPC1B, INPPL1, WAS, PIK3CG, VAV1, PIK3R5, VAV2, HCK, MARCKS, FCGR2A, SCIN, PTPRC, RAC2, FCGR1A, DOCK2, FCGR2B	809	84	6879	2226999823415150	0.136362	0.00542826	0.00455974
KEGG_PATHWAY	hsa05322:Systemic lupus erythematosus	30	1.3876e+16	7.15069e+11	C1QB, CD86, C1QA, C1R, TNF, C2, C3, C4B, C4A, HLA-DMA, FCGR3A, HLA-DMB, FCGR3B, C9, FCGR1A, HLA-DOA, TRIM21, HLA-DQA2, HLA-DQA1, HLA-DPA1, IL10, HLA-DRB5, FCGR2A, CD40LG, HLA-DPB1, HLA-DRA, HLA-DRB1, C1QC, SNRPB, HLA-DQB1	809	134	6879	1903676918251750	0.178575	0.007023	0.00589932
KEGG_PATHWAY	hsa05142:Chagas disease (American trypanosomiasis)	25	1.15634e+16	7.7632e+11	C1QB, C1QA, SERPINE1, CD3E, TNF, PIK3CG, GNAI2, PIK3R5, C3, GNA15, IRAK1, CCL5, CCL3, CCL2, FADD, IL10, TGFB1, TGFBR1, TNFRSF1A, PLCB3, IL1B, TLR6, CALR, C1QC, TLR2	809	104	6879	2.04401e+16	0.192305	0.00736166	0.00618379
KEGG_PATHWAY	hsa05200:Pathways in cancer	68	3145235892691950	8.5998e+11	RB1, CDKN1A, SPI1, BRCA2, ETS1, PIK3CG, GLI2, EDNRA, GNGT2, EDNRB, MYC, RAC2, ITGAV, PDGFRA, MMP2, WNT5A, F2R, WNT9B, FLT3LG, MMP9, TGFBR1, PGF, RUNX1, AR, PLCB3, COL4A2, TRAF4, SMO, COL4A1, COL4A6, CKS2, RARA, BIRC5, BIRC7, TP53, PTGER4, CSF1R, GSTP1, CXCR4, LPAR4, HIF1A, CSF2RA, RASGRP4, EGFR, GNAI2, PIK3R5, GNG2, E2F2, FADD, CDKN2B, TCF7L1, TGFB1, FZD2, CDKN2A, EGF, LAMB2, FN1, BMP4, BMP2, RAD…	809	393	6879	1.47127e+16	0.21069	0.00760208	0.00638574
KEGG_PATHWAY	hsa04064:NF-kappa B signaling pathway	22	1.01758e+16	8.76391e+11	LYN, VCAM1, SYK, BCL2A1, CCL4L2, LY96, TNFRSF13C, TNF, TNFSF13B, RELB, ICAM1, TNFRSF1A, CD40LG, IRAK1, PLAU, LCK, IL1B, CCL4, BLNK, BTK, CD14, CARD11	809	87	6879	2.15021e+16	0.214247	0.00760208	0.00638574
KEGG_PATHWAY	hsa05164:Influenza A	36	1.66512e+16	8.84605e+11	NXT1, NLRX1, TMPRSS2, NXT2, TNF, PIK3CG, PIK3R5, ICAM1, IFIH1, PYCARD, HLA-DMA, HLA-DMB, CCL5, CASP1, CCL2, HLA-DOA, HLA-DQA2, HLA-DQA1, HLA-DPA1, IL33, HLA-DRB5, IL18, TNFRSF10C, TNFRSF1A, IL1A, CXCL10, OAS1, OAS2, OAS3, IL1B, HLA-DPB1, HLA-DRA, TLR7, HLA-DRB1, TLR3, HLA-DQB1	809	174	6879	1.75926e+16	0.216022	0.00760208	0.00638574
KEGG_PATHWAY	hsa04350:TGF-beta signaling pathway	21	0.971323	0.00138194	SMAD1, CDKN2B, TGFB1, TGIF2, FST, NOG, INHBB, GDF5, BMP7, TNF, LTBP1, TGFBR1, BMP4, BMP2, RBL1, MYC, ID2, ID1, ID4, ID3, LEFTY2	809	84	6879	2.12577e+16	0.316342	0.0115162	0.00967359
KEGG_PATHWAY	hsa04512:ECM-receptor interaction	21	0.971323	0.00217412	LAMB2, TNC, FN1, HMMR, THBS2, COL1A1, COL3A1, COL1A2, COL4A2, IBSP, COL4A1, TNN, DAG1, COL4A6, SPP1, SDC1, ITGB8, ITGAV, ITGB6, AGRN, CD44	809	87	6879	2.05247e+16	0.450383	0.0173931	0.0146102
KEGG_PATHWAY	hsa05168:Herpes simplex infection	36	1.66512e+16	0.00221367	TNF, IFIH1, C3, HLA-DMA, HLA-DMB, CCL5, CCL2, FADD, HLA-DOA, HLA-DQA2, HLA-DQA1, HLA-DPA1, CD74, HLA-DRB5, ALYREF, HLA-B, HLA-C, TAP1, HLA-A, HLA-G, TNFRSF1A, HLA-E, OAS1, OAS2, OAS3, IL1B, CDK2, CDK1, HLA-DPB1, HLA-DRA, TP53, HLA-DRB1, TLR3, NECTIN2, HLA-DQB1, TLR2	809	183	6879	1.67274e+16	0.456342	0.0173931	0.0146102
KEGG_PATHWAY	hsa04620:Toll-like receptor signaling pathway	24	1.11008e+16	0.00236906	CD86, CXCL9, CCL4L2, LY96, TNF, PIK3CG, PIK3R5, TLR1, CXCL10, IRAK1, IL1B, CCL5, CCL4, SPP1, CCL3, TLR8, IRF5, TLR7, CD14, FADD, TLR6, TLR5, TLR3, TLR2	809	106	6879	1925227977703660	0.479135	0.018097	0.0152015
KEGG_PATHWAY	hsa05202:Transcriptional misregulation in cancer	33	1.52636e+16	0.00325525	CD86, CSF1R, CDKN1A, SPI1, ITGAM, BCL2A1, TMPRSS2, SIX1, HOXA10, LYL1, CCND2, PLAU, MYC, CD14, FCGR1A, NGFR, SMAD1, CDKN2C, EYA1, IGFBP3, ETV1, PAX5, ETV4, MMP9, ETV6, RUNX1, MYCN, ID2, TLX1, IL2RB, RARA, TCF3, TP53	809	167	6879	1.68025e+16	0.592068	0.0241944	0.0203233
KEGG_PATHWAY	hsa05145:Toxoplasmosis	24	1.11008e+16	0.00389317	IL10, HLA-DRB5, TGFB1, LAMB2, IL10RA, LY96, TNF, GNAI2, TNFRSF1A, HLA-DMA, HLA-DMB, CD40LG, IRAK1, HLA-DPB1, HLA-DRA, BIRC7, HLA-DOA, CCR5, HLA-DQA2, HLA-DQA1, HLA-DRB1, HLA-DPA1, HLA-DQB1, TLR2	809	110	6879	1855219687605340	0.657921	0.0281743	0.0236664
KEGG_PATHWAY	hsa05340:Primary immunodeficiency	11	0.508788	0.00442273	CD4, PTPRC, CD40LG, LCK, BLNK, BTK, TAP1, RFXANK, TNFRSF13C, CD3E, IL7R	809	34	6879	2.751e+16	0.704459	0.0311859	0.0261962
KEGG_PATHWAY	hsa04662:B cell receptor signaling pathway	17	0.786309	0.00531179	LYN, SYK, CD81, INPPL1, NFATC2, DAPP1, PIK3CG, VAV1, PIK3R5, VAV2, BLNK, BTK, RAC2, PTPN6, PIK3AP1, FCGR2B, CARD11	809	69	6879	2094964260762070	0.768838	0.0365186	0.0306756
KEGG_PATHWAY	hsa05132:Salmonella infection	19	0.878816	0.0067908	ARPC1B, CCL4L2, RHOG, IL18, WAS, CXCL3, PYCARD, IL1A, IL1B, CCL4, CASP1, CCL3, FLNA, CD14, FLNC, PKN1, PFN1, RAB7B, TLR5	809	83	6879	1946490535690350	0.846467	0.0450233	0.0378196
KEGG_PATHWAY	hsa04670:Leukocyte transendothelial migration	24	1.11008e+16	0.00687629	ITGAM, VCAM1, NCF1, NCF2, MMP2, ITGB2, NCF4, CXCR4, RHOH, CYBA, ITGAL, MMP9, PIK3CG, VAV1, PIK3R5, VAV2, GNAI2, ICAM1, CLDN7, RAC2, EZR, CD99, JAM2, SIPA1	809	115	6879	1.77456e+16	0.850059	0.0450233	0.0378196
KEGG_PATHWAY	hsa05212:Pancreatic cancer	16	0.740056	0.00717147	RB1, TGFB1, CDKN2A, EGF, BRCA2, EGFR, TGFBR1, PIK3CG, PIK3R5, RAD51, CDK6, CDK4, RAC2, E2F2, TP53, ARHGEF6	809	65	6879	2.09307e+16	0.861828	0.045864	0.0385258
KEGG_PATHWAY	hsa05222:Small cell lung cancer	19	0.878816	0.00875698	RB1, CDKN2B, LAMB2, FN1, PIK3CG, PIK3R5, CDK6, COL4A2, TRAF4, COL4A1, CDK4, MYC, CDK2, COL4A6, CKS2, E2F2, ITGAV, BIRC7, TP53	809	85	6879	1.90069e+16	0.91097	0.0547311	0.0459742
KEGG_PATHWAY	hsa04062:Chemokine signaling pathway	34	1572617946345970	0.00951273	CX3CR1, CXCL9, NCF1, CCL4L2, WAS, CXCR4, CXCL13, CXCL3, PIK3CG, CXCL16, GNAI2, PIK3R5, GRK1, CCL8, GNGT2, GNG2, CCL5, CCL4, CCL3, RAC2, CCL2, CCR5, CCL18, CCR2, CCR1, LYN, CCL20, VAV1, VAV2, CXCL10, HCK, PLCB3, GNB4, DOCK2	809	186	6879	1.55433e+16	0.927815	0.0581334	0.048832
KEGG_PATHWAY	hsa05146:Amoebiasis	22	1.01758e+16	0.0106355	IL10, TGFB1, ITGAM, LAMB2, ITGB2, FN1, TNF, PIK3CG, PIK3R5, COL1A1, COL3A1, GNA15, PLCB3, COL1A2, COL4A2, COL4A1, IL1B, C9, COL4A6, CD14, RAB7B, TLR2	809	106	6879	1.76479e+16	0.947156	0.0635816	0.0534086
KEGG_PATHWAY	hsa05020:Prion diseases	10	0.462535	0.0141205	C1QB, IL1A, EGR1, C1QA, NOTCH1, CCL5, IL1B, C9, BAX, C1QC	809	34	6879	2.50091e+16	0.979976	0.0826199	0.0694007
KEGG_PATHWAY	hsa04611:Platelet activation	25	1.15634e+16	0.015663	MYLK2, ITPR2, PIK3CG, GNAI2, PIK3R5, PTGS1, TBXA2R, LYN, P2RY12, FCER1G, SYK, F2R, PLA2G4A, VAMP8, APBB1IP, COL1A1, COL3A1, PLCB3, FCGR2A, COL1A2, TBXAS1, BTK, LCP2, F2RL3, FERMT3	809	130	6879	1.63521e+16	0.986982	0.0897359	0.0753782
KEGG_PATHWAY	hsa05205:Proteoglycans in cancer	35	1.61887e+16	0.016079	CD63, CDKN1A, TWIST1, ITPR2, HIF1A, TNF, HOXD10, EGFR, PIK3CG, PIK3R5, PLAU, MYC, FLNA, TIMP3, ITGAV, FLNC, TGFB1, FZD2, LUM, MMP2, RDX, WNT5A, IGF2, FN1, WNT9B, MMP9, SMO, SDC1, HCLS1, PTPN6, HPSE, EZR, TP53, CD44, TLR2	809	200	6879	1.48804e+16	0.988411	0.0902393	0.075801
KEGG_PATHWAY	hsa05219:Bladder cancer	11	0.508788	0.0177437	RB1, CDKN1A, CDKN2A, CDK4, EGF, MYC, MMP2, E2F2, TP53, MMP9, EGFR	809	41	6879	2281316892278930	0.992725	0.0975906	0.0819761
KEGG_PATHWAY	hsa04650:Natural killer cell mediated cytotoxicity	23	1.06383e+16	0.0257852	FCER1G, SYK, ITGB2, TNFRSF10C, NFATC2, ITGAL, TNF, PIK3CG, VAV1, PIK3R5, VAV2, ICAM1, FCGR3A, KLRK1, FCGR3B, TYROBP, LCK, RAC2, LCP2, CD48, PTPN6, HCST, CD244	809	122	6879	1603041601653520	0.999241	0.139038	0.116792
KEGG_PATHWAY	hsa04151:PI3K-Akt signaling pathway	53	2.45143e+16	0.0326889	CDKN1A, CSF1, TNC, PIK3CG, GNGT2, CCND2, IBSP, TNN, CREB3L4, MYC, ITGB8, ITGAV, ITGB6, PDGFRA, SYK, F2R, PGF, COL4A2, COL4A1, COL4A6, TP53, TLR2, CSF1R, LPAR4, THBS2, EFNA4, EGFR, PIK3R5, BCL2L11, GNG2, PDGFC, SPP1, EIF4EBP1, NGFR, EGF, LAMB2, OSM, FN1, COL1A1, COL3A1, EFNA2, CDK6, COL1A2, LPAR5, CDK4, IL2RA, IL2RB, CDK2, GNB4, PKN1, PIK3AP1, IL7R, FGF11	809	345	6879	1306271833181060	0.999893	0.172874	0.145214
KEGG_PATHWAY	hsa05143:African trypanosomiasis	9	0.416281	0.033521	IL10, PLCB3, VCAM1, IL1B, IL18, F2RL1, TNF, IDO1, ICAM1	809	33	6879	2319024609506680	0.999915	0.17393	0.146101
KEGG_PATHWAY	hsa05162:Measles	24	1.11008e+16	0.0357098	TNFRSF10C, TACR1, CD3E, PIK3CG, PIK3R5, IFIH1, IL1A, DOK1, CDK6, CCND2, IRAK1, OAS1, OAS2, CDK4, IL1B, IL2RA, OAS3, IL2RB, CDK2, RACK1, TLR7, FCGR2B, TP53, TLR2	809	133	6879	1.53439e+16	0.999955	0.181855	0.152759
KEGG_PATHWAY	hsa04668:TNF signaling pathway	20	0.925069	0.0419201	VCAM1, CSF1, CCL20, LIF, NOD2, CXCL3, TNFRSF1B, TNF, MMP9, PIK3CG, PIK3R5, ICAM1, TNFRSF1A, CXCL10, MMP14, CREB3L4, IL1B, CCL5, CCL2, FADD	809	107	6879	1.58936e+16	0.999992	0.209601	0.176064
KEGG_PATHWAY	hsa05134:Legionellosis	12	0.555042	0.0463626	PYCARD, C3, ITGAM, IL1B, ITGB2, CASP1, IL18, CD14, CXCL3, TLR5, TNF, TLR2	809	54	6879	1.88958e+16	0.999998	0.227673	0.191246
KEGG_PATHWAY	hsa04810:Regulation of actin cytoskeleton	34	1572617946345970	0.0481632	CYFIP1, MYLK2, ITGAM, ARPC1B, ITGB2, WAS, ITGAL, IQGAP2, IQGAP3, EGFR, PIK3CG, PIK3R5, FGD3, SCIN, PDGFC, RAC2, ITGB8, ITGAV, NCKAP1L, ITGB6, PDGFRA, EGF, RDX, F2R, FN1, VAV1, VAV2, ENAH, DIAPH2, DIAPH3, EZR, PFN1, FGF11, ARHGEF6	809	210	6879	1376690799929360	0.999999	0.232343	0.195168
KEGG_PATHWAY	hsa04330:Notch signaling pathway	11	0.508788	0.0490033	APH1A, LFNG, NOTCH2, NCSTN, NOTCH1, DTX3L, MAML2, MFNG, DLL1, HES5, DLL3	809	48	6879	1.94862e+16	0.999999	0.232343	0.195168
KEGG_PATHWAY	hsa05218:Melanoma	14	0.647549	0.0677313	RB1, PDGFRA, CDKN1A, CDKN2A, EGF, EGFR, PIK3CG, PIK3R5, CDK6, CDK4, PDGFC, E2F2, TP53, FGF11	809	71	6879	1.67667e+16	1	0.315697	0.265185
KEGG_PATHWAY	hsa00532:Glycosaminoglycan biosynthesis - chondroitin sulfate / dermatan sulfate	6	0.277521	0.0765489	CHST11, CHPF, CHPF2, UST, CHST14, CHST3	809	20	6879	2.55093e+16	1	0.350849	0.294713
KEGG_PATHWAY	hsa05161:Hepatitis B	24	1.11008e+16	0.0809648	RB1, CDKN1A, EGR2, TGFB1, PCNA, NFATC2, TNF, MMP9, TGFBR1, PIK3CG, PIK3R5, IFIH1, CDK6, CREB3L4, CDK4, MYC, CDK2, BAX, BIRC5, E2F2, FADD, TP53, TLR3, TLR2	809	145	6879	1.40741e+16	1	0.365005	0.306604
KEGG_PATHWAY	hsa03410:Base excision repair	8	0.370028	0.0845402	FEN1, NEIL3, PCNA, PARP4, POLD1, POLE2, APEX1, POLD2	809	33	6879	2.06136e+16	1	0.374977	0.314981
KEGG_PATHWAY	hsa04974:Protein digestion and absorption	16	0.740056	0.0872626	COL22A1, ELN, PRCP, SLC3A2, SLC1A5, DPP4, COL1A1, COL3A1, SLC7A7, COL1A2, COL4A2, COL4A1, XPNPEP2, FXYD2, KCNQ1, COL4A6	809	88	6879	1.54602e+16	1	0.380908	0.319963
