# Supplementary material for: Homeostatic status of thyroid hormones and brain water movement as determinant factors in biology of cerebral gliomas: a pilot study using a bioinformatics approach
Source: Front Neurosci. 2024 Feb 27;18:1349421. doi: 10.3389/fnins.2024.1349421 (PMC10927765; doi:10.3389/fnins.2024.1349421)
Supplement: Supplementary file 5 [file Table_2.XLSX]

## Sheet: GBM Down_regulated from DAVID
Category	Term	Count	%	PValue	Genes	List Total	Pop Hits	Pop Total	Fold Enrichment	Bonferroni	Benjamini	FDR
KEGG_PATHWAY	hsa04020:Calcium signaling pathway	62	2475049900199600	0.390126	CHRM2, RYR1, RYR2, CALML5, CALML6, CHRM5, ATP2A3, HTR2C, CALML3, HTR4, GRM1, RYR3, SLC8A2, PPP3CA, PPP3CB, HTR6, GRM5, BDKRB1, NOS1, PRKCG, PRKCB, TNNC1, TNNC2, TACR2, PLCB4, ADORA2A, CCKBR, ITPKA, CAMK2B, PDE1C, PDE1B, PDE1A, CAMK2A, CACNA1B, ADCY4, ITPR1, CACNA1A, CACNA1C, ADCY1, CACNA1F, CACNA1E, CACNA1H, CACNA1G, CACNA1I, PPP3R1, GRIN2A, PTK2B, CACNA1S, DRD1, DRD5, ATP2B3, ATP2B2, ATP2B1, HTR…	755	179	6879	3.15585e+16	103.383	103.383	8.66079
KEGG_PATHWAY	hsa04723:Retrograde endocannabinoid signaling	42	1.67665e+16	0.855104	GABRB3, GABRB2, FAAH, CACNA1B, ADCY4, ITPR1, CACNA1A, CACNA1C, ADCY1, CACNA1F, GRM1, ADCY5, RIMS1, MAPK9, GNG3, GRM5, GNG7, SLC17A7, CACNA1S, GABRE, GABRD, KCNJ3, PRKCG, GABRA2, GABRA1, KCNJ6, SLC32A1, GABRA6, PRKCB, KCNJ9, GABRA5, GABRA4, GABRG3, GABRG2, GABRG1, MAPK13, GNG13, MAPK11, PLCB4, GNB3, GNB5, MGLL	755	101	6879	3788840076060580	2265.41	11330.1	94.9165
KEGG_PATHWAY	hsa04713:Circadian entrainment	40	1.59681e+16	251.247	CAMK2B, RYR1, RYR2, CALML5, CALML6, CAMK2A, ADCY4, ITPR1, CALML3, CACNA1C, ADCY1, CACNA1H, RYR3, CACNA1G, ADCY5, CACNA1I, GRIN2A, GNG3, RPS6KA5, GNG7, PRKG2, NOS1, KCNJ3, PRKCG, KCNJ6, PRKCB, KCNJ9, GRIN2C, GRIN2B, GRIN1, GNG13, ADCY10, PLCB4, PER3, NOS1AP, GNB3, CALM3, GNB5, CALM1, CALM2	755	95	6879	3.83632e+16	66491.3	22193.5	18592.3
KEGG_PATHWAY	hsa04261:Adrenergic signaling in cardiomyocytes	49	1.95609e+16	50.6392	RYR2, CALML5, CALML6, CALML3, RPS6KA5, CREB3L3, SCN5A, SCN1B, CACNA2D1, TNNC1, PPP2R5B, CACNA2D3, CACNA2D2, ATP1B1, CACNB1, CACNB2, CACNB3, CACNB4, PLCB4, MYL2, TNNT2, SCN4B, MYH6, RAPGEF3, RAPGEF4, CAMK2B, CAMK2A, ADCY4, ATP1A3, CACNA1C, ADCY1, CACNA1F, ADCY5, CACNG8, TNNI3, CACNA1S, CACNG2, CACNG3, ATP2B3, ATP2B2, ATP2B1, MAPK13, MAPK11, ACTC1, PPP2R2C, PPP1R1A, CALM3, CALM1, CALM2	755	138	6879	3235156924848830	134159	3354.85	2810.48
KEGG_PATHWAY	hsa05032:Morphine addiction	38	1.51697e+16	1688.7	GABRB3, GABRB2, PDE1C, PDE1B, PDE1A, CACNA1B, ADCY4, CACNA1A, ARRB1, ADCY1, ADCY5, GNG3, GNG7, DRD1, GABRE, GABRD, KCNJ3, PRKCG, GABRA2, GABRA1, KCNJ6, SLC32A1, GABRA6, PRKCB, KCNJ9, GABRA5, GABRA4, PDE2A, PDE4C, OPRM1, GABRG3, GABRG2, GABRG1, GNG13, PDE10A, GNB3, PDE7B, GNB5	755	91	6879	3.8047e+16	44749.2	8788.9	7362.78
KEGG_PATHWAY	hsa04080:Neuroactive ligand-receptor interaction	74	2.95409e+16	1989.94	GABRB3, CHRM2, GABRB2, VIPR1, PRSS1, NPFFR1, CHRM5, HTR2C, GRIK1, PRL, PTH1R, HTR4, GRM1, MC4R, GRM3, GRM2, HTR6, GRM5, GRM4, GRM7, BDKRB1, PRSS3, PRSS2, PTGDR, CHRNB3, NPY5R, NPY1R, TACR2, OPRM1, ADRA2C, GABRG3, SSTR3, PRLR, GABRG2, GABRG1, ADORA2A, CCKBR, CHRNA2, GIPR, CHRNA4, LPAR1, GPR83, LPAR3, PLG, CRHR1, CRHR2, GLRA2, GRIN2A, HRH3, P2RY2, CHRNE, KISS1R, DRD1, GABRE, S1PR5, DRD2, GABRD, DRD…	755	277	6879	2434054558060580	527223	8788.9	7362.78
KEGG_PATHWAY	hsa04921:Oxytocin signaling pathway	50	1996007984031930	4292.09	RYR1, RYR2, CALML5, CALML6, OXT, CALML3, RYR3, PPP3CA, PPP3CB, PRKCG, PRKCB, CACNA2D1, PLA2G4B, CACNA2D3, CACNA2D2, CACNB1, CACNB2, CACNB3, CACNB4, PLCB4, JMJD7-PLA2G4B, PPP1R12B, PPP1R12C, CAMK1G, CAMK2B, CAMK2A, ADCY4, ITPR1, CACNA1C, ADCY1, CACNA1F, CAMKK1, CAMKK2, ADCY5, TRPM2, CACNG8, PPP3R1, CACNA1S, CACNG2, CACNG3, KCNJ3, KCNJ4, KCNJ6, KCNJ9, KCNJ12, NFATC4, CAMK4, CALM3, CALM1, CALM2	755	150	6879	3.03709e+16	1.13741e+06	162486	13612.1
KEGG_PATHWAY	hsa04727:GABAergic synapse	36	1437125748502990	494.892	GABRB3, GABRB2, GLS2, CACNA1B, ADCY4, CACNA1A, CACNA1C, ADCY1, CACNA1F, TRAK2, ADCY5, GLS, GNG3, GNG7, CACNA1S, GABRE, GABRD, PRKCG, NSF, GABRA2, GABRA1, GABARAPL1, KCNJ6, SLC32A1, GABRA6, PRKCB, GABRA5, GAD1, GABRA4, GAD2, GABRG3, GABRG2, GABRG1, GNG13, GNB3, GNB5	755	85	6879	3.85889e+16	1.31158e+06	1639.33	137333
KEGG_PATHWAY	hsa04724:Glutamatergic synapse	41	1.63673e+16	5002.24	GLS2, ADCY4, SLC1A2, ITPR1, CACNA1A, GRIK1, CACNA1C, ADCY1, SLC1A6, GRM1, ADCY5, GLS, GRM3, PPP3CA, GRM2, GRIN2A, PPP3CB, PPP3R1, GNG3, GRM5, GRM4, GRM7, GNG7, SLC17A7, KCNJ3, PRKCG, PRKCB, HOMER2, PLA2G4B, GRIN2C, GRIN2B, GRIN1, GNG13, PLCB4, DLG4, JMJD7-PLA2G4B, GNB3, GNB5, SHANK3, SHANK2, SHANK1	755	114	6879	3.27686e+16	1.32559e+06	1.47288e+06	1.23389e+06
KEGG_PATHWAY	hsa04728:Dopaminergic synapse	43	1716566866267460	181015	CAMK2B, CALML5, CALML6, CAMK2A, CACNA1B, ITPR1, CACNA1A, CALML3, CACNA1C, ADCY5, PPP3CA, MAPK9, GRIN2A, PPP3CB, GNG3, CREB3L3, KIF5C, GNG7, KIF5A, DRD1, DRD2, DRD5, KCNJ3, PRKCG, KCNJ6, PRKCB, KCNJ9, PPP2R5B, GRIN2B, MAPK13, GNG13, MAPK11, PLCB4, GNAL, CALY, TH, PPP2R2C, PPP1R1B, GNB3, CALM3, GNB5, CALM1, CALM2	755	128	6879	3.06081e+16	4.7969e+06	479689	4.01853e+06
KEGG_PATHWAY	hsa05033:Nicotine addiction	21	0.838323	804514	GABRB3, GABRA2, GABRB2, GABRA1, SLC32A1, GABRA6, CHRNA4, GABRA5, GABRA4, CACNA1B, CACNA1A, GRIN2C, GABRG3, GRIN2B, GABRG2, GABRG1, GRIN1, GRIN2A, SLC17A7, GABRE, GABRD	755	40	6879	478341059602649	2.13196e+09	1.93815e+07	1.62366e+08
KEGG_PATHWAY	hsa04720:Long-term potentiation	27	1.07784e+16	1.63101e+07	CAMK2B, CALML5, CALML6, CAMK2A, ITPR1, CALML3, CACNA1C, ADCY1, GRM1, PPP3CA, RPS6KA6, GRIN2A, PPP3CB, PPP3R1, GRM5, PRKCG, PRKCB, GRIN2C, GRIN2B, GRIN1, PLCB4, PPP1R1A, CAMK4, CALM3, CALM1, CALM2, RAPGEF3	755	66	6879	3.72733e+16	4.32217e+09	3.60181e+08	3.01736e+08
KEGG_PATHWAY	hsa04925:Aldosterone synthesis and secretion	30	1.1976e+16	2.6132e+07	CAMK2B, CALML5, KCNK9, CALML6, CAMK2A, ADCY4, ITPR1, CALML3, CACNA1C, ADCY1, CACNA1F, CACNA1H, CACNA1G, ADCY5, CACNA1I, CREB3L3, CYP11A1, CACNA1S, PRKCG, PRKCB, PDE2A, NR4A2, NR4A1, PLCB4, STAR, CAMK4, CALM3, CALM1, CALM2, CAMK1G	755	81	6879	3.37454e+16	6.92497e+08	5.3269e+08	4.46253e+07
KEGG_PATHWAY	hsa04726:Serotonergic synapse	35	1.39721e+16	1.16814e+07	GABRB3, GABRB2, ALOX15, CACNA1B, ITPR1, CACNA1A, HTR2C, ALOX12B, CACNA1C, CACNA1F, HTR4, ADCY5, GNG3, HTR6, CYP4X1, CYP2D6, GNG7, CACNA1S, KCNJ3, PRKCG, KCNJ6, HTR1E, PRKCB, KCNJ9, PLA2G4B, HTR1B, HTR3A, HTR5A, GNG13, CYP2C8, PLCB4, JMJD7-PLA2G4B, GNB3, GNB5, RAPGEF3	755	111	6879	2.87292e+16	3.09556e+09	2.21111e+09	1.85233e+08
KEGG_PATHWAY	hsa04024:cAMP signaling pathway	50	1996007984031930	2.0871e+08	CHRM2, RYR2, CALML5, CALML6, HHIP, CALML3, HTR4, HTR6, CREB3L3, PDE4C, NPY1R, ATP1B1, TIAM1, ADORA2A, RAPGEF3, RAPGEF4, CNGB1, CAMK2B, GIPR, CAMK2A, ADCY4, ATP1A3, CACNA1C, ADCY1, CACNA1F, ADCY5, MAPK9, PAK1, GRIN2A, TNNI3, CACNA1S, DRD1, DRD2, DRD5, HTR1E, HTR1B, ATP2B3, ATP2B2, ATP2B1, GRIN2C, GRIN2B, GRIN1, ADCY10, CAMK4, PPP1R1B, FXYD1, CALM3, CALM1, CALM2, HCN2	755	198	6879	2.30082e+16	5.5308e+09	3.68721e+09	3.08891e+09
KEGG_PATHWAY	hsa05414:Dilated cardiomyopathy	29	1157684630738520	3.01819e+08	RYR2, ITGA2B, ADCY4, CACNA1C, ADCY1, CACNA1F, TTN, ADCY5, CACNG8, SGCA, TNNI3, CACNA1S, CACNG2, CACNG3, MYBPC3, CACNA2D1, TNNC1, CACNA2D3, CACNA2D2, CACNB1, CACNB2, CACNB3, ACTC1, DES, CACNB4, ITGA10, MYL2, TNNT2, ITGA8	755	84	6879	3.14555e+16	7.99818e+09	4.99888e+07	4.18774e+08
KEGG_PATHWAY	hsa05031:Amphetamine addiction	25	0.998004	4.40886e+07	CAMK2B, CALML5, CALML6, CAMK2A, CALML3, CACNA1C, ADCY5, PPP3CA, GRIN2A, PPP3CB, PPP3R1, CREB3L3, DRD1, PRKCG, PRKCB, GRIN2C, GRIN2B, GRIN1, TH, CAMK4, PPP1R1B, CALM3, CALM1, CALM2, STX1A	755	66	6879	3451234196267300	1.16834e+11	6.87263e+08	5.75745e+08
KEGG_PATHWAY	hsa04010:MAPK signaling pathway	57	2.27545e+16	1.33958e+09	PTPRR, RASGRF2, RASGRF1, ARRB1, FGF3, FGF5, PPP3CA, PPP3CB, RPS6KA6, RPS6KA5, FGF9, PRKCG, DUSP5, MAP4K2, DUSP2, PRKCB, CACNA2D1, PLA2G4B, CACNA2D3, CACNA2D2, DUSP8, MAPK8IP2, MAPK8IP3, CACNB1, CACNB2, CACNB3, CACNB4, JMJD7-PLA2G4B, RASA2, CACNA1B, CACNA1A, CACNA1C, CACNA1F, RASGRP2, CACNA1E, CACNA1H, CACNA1G, CACNA1I, MAPK9, CACNG8, PPP3R1, PAK1, NTF3, CACNA1S, CACNG2, CACNG3, FGF22, MAPK13, FGF…	755	253	6879	2.05273e+16	3.54983e+10	1.97216e+08	1.65215e+10
KEGG_PATHWAY	hsa04725:Cholinergic synapse	33	1.31737e+16	1.54219e+09	CHRM2, CAMK2B, ACHE, CHRNA4, CHRM5, CAMK2A, CACNA1B, ADCY4, ITPR1, CACNA1A, CACNA1C, ADCY1, CACNA1F, ADCY5, GNG3, CREB3L3, GNG7, CACNA1S, KCNJ3, PRKCG, KCNJ4, KCNJ6, PRKCB, KCNJ12, GNG13, SLC5A7, PLCB4, CAMK4, KCNQ2, KCNQ3, GNB3, KCNQ4, GNB5	755	111	6879	2.70875e+16	4.08671e+11	2.15094e+08	1.80192e+10
KEGG_PATHWAY	hsa04972:Pancreatic secretion	29	1157684630738520	3.44476e+09	PNLIPRP1, CELA3A, PNLIPRP2, RYR2, PRSS1, CELA3B, ADCY4, ATP2A3, ITPR1, ATP1A3, ADCY1, ADCY5, PRSS3, PRSS2, CLCA4, PRKCG, CPA2, CPA1, CELA2A, PRKCB, PLA2G2A, ATP2B3, ATP2B2, CEL, ATP2B1, ATP1B1, PLCB4, KCNMA1, PNLIP	755	93	6879	2.84115e+16	9.1282e+10	4.56431e+09	3.82368e+09
KEGG_PATHWAY	hsa04721:Synaptic vesicle cycle	23	0.918164	3.67567e+09	NSF, UNC13C, SNAP25, RAB3A, UNC13A, ATP6V1G2, SLC32A1, SYT1, STXBP1, CACNA1B, CACNA1A, CPLX2, CPLX1, CPLX4, DNM1, CPLX3, DNM3, STX1B, RIMS1, SLC17A7, ATP6V0A4, STX3, STX1A	755	63	6879	332633238725954	9.74006e+10	4.63835e+10	3.88571e+09
KEGG_PATHWAY	hsa05410:Hypertrophic cardiomyopathy (HCM)	26	1037924151696600	3.92154e+09	RYR2, ITGA2B, CACNA1C, CACNA1F, TTN, CACNG8, SGCA, TNNI3, CACNA1S, CACNG2, CACNG3, MYBPC3, CACNA2D1, TNNC1, CACNA2D3, CACNA2D2, CACNB1, CACNB2, CACNB3, ACTC1, DES, CACNB4, ITGA10, MYL2, TNNT2, ITGA8	755	78	6879	3037086092715230	1.03915e+11	4.72367e+09	3.95719e+10
KEGG_PATHWAY	hsa04911:Insulin secretion	27	1.07784e+16	6.4272e+07	CAMK2B, SNAP25, RYR2, RAB3A, CAMK2A, ADCY4, ATP1A3, CACNA1C, ADCY1, CACNA1F, ADCY5, RIMS2, PCLO, CREB3L3, KCNN1, CACNA1S, FFAR1, PRKCG, PRKCB, ABCC8, ATP1B1, GCK, ADCYAP1, PLCB4, KCNMA1, STX1A, RAPGEF4	755	85	6879	2.89416e+16	1.70306e+12	7.40525e+08	6.20365e+09
KEGG_PATHWAY	hsa04260:Cardiac muscle contraction	25	0.998004	6.92365e+08	RYR2, ATP1A3, CACNA1C, CACNA1F, COX7A1, COX6A2, CACNG8, TNNI3, CACNA1S, CACNG2, CACNG3, CACNA2D1, TNNC1, CACNA2D3, CACNA2D2, COX6B2, ATP1B1, CACNB1, CACNB2, CACNB3, ACTC1, CACNB4, MYL2, TNNT2, MYH6	755	75	6879	3.03709e+16	1.8346e+11	7.64486e+09	6.40437e+09
KEGG_PATHWAY	hsa04970:Salivary secretion	27	1.07784e+16	8.27344e+08	CALML5, CALML6, ADCY4, ITPR1, ATP1A3, CALML3, AQP5, ADCY1, RYR3, ADCY5, PRB2, MUC7, PRKG2, NOS1, PRKCG, PRKCB, ATP2B3, ATP2B2, ATP2B1, MUC5B, ATP1B1, PLCB4, TRPV6, KCNMA1, CALM3, CALM1, CALM2	755	86	6879	2860511319882950	2.19222e+11	8.76985e+09	7.34681e+09
KEGG_PATHWAY	hsa04924:Renin secretion	22	0.878244	2.1785e+10	PDE1C, CALML5, PDE1B, CALML6, PDE1A, ITPR1, CALML3, CACNA1C, CACNA1F, ADCY5, ADCYAP1, PPP3CA, PPP3CB, PPP3R1, PLCB4, KCNMA1, PRKG2, CALM3, CACNA1S, CALM1, CALM2, CLCA4	755	64	6879	3131995033112580	5.77137e+11	2.22039e+11	1.8601e+11
KEGG_PATHWAY	hsa04750:Inflammatory mediator regulation of TRP channels	27	1.07784e+16	1.20573e+11	CAMK2B, CALML5, CALML6, CAMK2A, ADCY4, ITPR1, HTR2C, CALML3, ADCY1, ADCY5, MAPK9, P2RY2, BDKRB1, ASIC2, ASIC3, PRKCG, PRKCB, PLA2G4B, TRPV3, TRPV1, MAPK13, MAPK11, PLCB4, JMJD7-PLA2G4B, CALM3, CALM1, CALM2	755	98	6879	2.51024e+16	0.00319011	1.1834e+12	9.9138e+10
KEGG_PATHWAY	hsa04974:Protein digestion and absorption	25	0.998004	1.57048e+11	COL17A1, CELA3A, PRSS1, CELA3B, COL13A1, COL11A2, ATP1A3, SLC8A2, PRSS3, PRSS2, CPA2, CPA1, CELA2A, COL27A1, COL24A1, MME, KCNJ13, ATP1B1, SLC7A9, COL7A1, COL4A3, COL9A1, COL21A1, COL9A3, COL6A6	755	88	6879	2588425647200480	0.00415316	1.48635e+12	1.24517e+12
KEGG_PATHWAY	hsa05412:Arrhythmogenic right ventricular cardiomyopathy (ARVC)	21	0.838323	1.88949e+11	RYR2, CACNA2D1, ITGA2B, CACNA2D3, CACNA2D2, CACNA1C, CACNA1F, CACNB1, CACNB2, CACNB3, CACNG8, DES, CACNB4, SGCA, ITGA10, ITGA8, PKP2, CTNNA3, CACNA1S, CACNG2, CACNG3	755	67	6879	2.85577e+16	0.00499468	1.7266e+11	1.44644e+12
KEGG_PATHWAY	hsa04014:Ras signaling pathway	46	1.83633e+16	4.20988e+10	FLT1, CALML5, CALML6, RASGRF2, RASGRF1, CALML3, RASAL1, FOXO4, EFNA5, RASGRP2, FGF3, FGF5, MAPK9, PAK1, GRIN2A, GNG3, FGF9, GNG7, PAK6, PAK5, FGF22, PRKCG, PRKCB, PLA2G4B, PLA2G2A, VEGFD, KSR2, GRIN2B, GRIN1, GNG13, FGF17, TIAM1, JMJD7-PLA2G4B, RASA2, GNB3, CALM3, GNB5, RIN1, FGF13, CALM1, RAPGEF5, FGFR3, CALM2, FGFR2, LAT, PLA1A	755	226	6879	185450389732169	0.0110944	3.71873e+12	3.11531e+12
KEGG_PATHWAY	hsa04015:Rap1 signaling pathway	43	1716566866267460	6.80041e+10	FLT1, RGS14, CALML5, CALML6, ITGA2B, ADCY4, LPAR1, LPAR3, CALML3, ADCY1, EFNA5, RASGRP2, PRKCZ, FGF3, RAP1GAP, ADCY5, FGF5, GRIN2A, SIPA1L1, FGF9, DRD2, FGF22, PRKCG, PRKCB, VEGFD, GRIN2B, GRIN1, MAPK13, FGF17, MAPK11, TIAM1, PLCB4, ADORA2A, CALM3, FGF13, CALM1, RAPGEF5, FGFR3, CALM2, FGFR2, LAT, RAPGEF3, RAPGEF4	755	210	6879	1.86564e+16	0.0178603	5.81326e+11	4.86997e+10
KEGG_PATHWAY	hsa04971:Gastric acid secretion	21	0.838323	7.40043e+10	PRKCG, CAMK2B, CALML5, CALML6, PRKCB, CAMK2A, ADCY4, ITPR1, ATP1A3, CALML3, ADCY1, ATP1B1, ADCY5, ATP4A, PLCB4, CCKBR, SST, CALM3, CALM1, CALM2, KCNJ1	755	73	6879	2.62105e+16	0.0194208	6.12848e+11	5.13405e+11
KEGG_PATHWAY	hsa04912:GnRH signaling pathway	24	0.958084	8.67425e+10	CAMK2B, CALML5, CALML6, PRKCB, PLA2G4B, CAMK2A, ADCY4, ITPR1, CALML3, CACNA1C, ADCY1, CACNA1F, MAPK13, ADCY5, MAPK11, MAPK9, PLCB4, JMJD7-PLA2G4B, PTK2B, GNRH1, CALM3, CACNA1S, CALM1, CALM2	755	91	6879	2.40297e+16	0.0227256	6.96569e+10	5.83541e+10
KEGG_PATHWAY	hsa04070:Phosphatidylinositol signaling system	24	0.958084	2.86632e+11	PRKCG, CDS1, DGKE, CALML5, CALML6, PRKCB, ITPR1, CALML3, SYNJ2, DGKZ, MTMR7, INPP5A, PLCB4, PPIP5K1, DGKQ, ITPKA, PI4KA, INPP5J, PIP4K2A, CALM3, PIP5K1B, CALM1, CALM2, DGKH	755	98	6879	2.23133e+16	0.0731545	0.00223404	0.00187154
KEGG_PATHWAY	hsa04022:cGMP-PKG signaling pathway	32	1.27745e+16	8.36924e+11	CALML5, CALML6, ADCY4, ATP2A3, ITPR1, ATP1A3, CALML3, CACNA1C, ADCY1, CACNA1F, SLC8A2, ADCY5, NPPB, PPP3CA, PPP3CB, PPP3R1, CREB3L3, PRKG2, CACNA1S, PDE2A, ATP2B3, ATP2B2, ATP2B1, ADRA2C, ATP1B1, NFATC4, PLCB4, KCNMA1, CALM3, CALM1, CALM2, CNGB1	755	158	6879	1.84532e+16	0.198987	0.00633671	0.00530849
KEGG_PATHWAY	hsa04744:Phototransduction	10	0.399202	0.00164361	RCVRN, CALML5, CALML6, GUCA1A, PDE6B, CALM3, CALML3, CALM1, CALM2, CNGB1	755	27	6879	3.37454e+16	0.353328	0.0119687	0.0100266
KEGG_PATHWAY	hsa04270:Vascular smooth muscle contraction	25	0.998004	0.0016711	CALML5, CALML6, ADCY4, ITPR1, CALML3, CACNA1C, ADCY1, CACNA1F, ACTG2, ADCY5, CACNA1S, PRKCG, PPP1R14A, PRKCB, PLA2G4B, PLA2G2A, PLCB4, ADORA2A, JMJD7-PLA2G4B, KCNMA1, CALM3, CALM1, PPP1R12B, CALM2, PPP1R12C	755	117	6879	1946850059432840	0.358029	0.0119687	0.0100266
KEGG_PATHWAY	hsa05014:Amyotrophic lateral sclerosis (ALS)	14	0.558882	0.00223022	SLC1A2, GRIN2C, GRIN2B, MAPK13, GRIN1, MAPK11, PPP3CA, GRIN2A, PPP3CB, PPP3R1, NEFL, NEFM, NOS1, NEFH	755	50	6879	2.55115e+16	0.446596	0.0155528	0.0130292
KEGG_PATHWAY	hsa04916:Melanogenesis	21	0.838323	0.00531493	PRKCG, CAMK2B, WNT10B, WNT10A, CALML5, CALML6, PRKCB, TYRP1, CAMK2A, FZD9, ADCY4, CALML3, ADCY1, ADCY5, POMC, PLCB4, CREB3L3, CALM3, CALM1, WNT1, CALM2	755	100	6879	1.91336e+16	0.756396	0.0361142	0.0302542
KEGG_PATHWAY	hsa05030:Cocaine addiction	13	0.518962	0.00551585	GRIN2C, GRIN2B, ADCY5, GRIN1, GRM3, GRM2, GRIN2A, TH, CREB3L3, DLG4, PPP1R1B, DRD1, DRD2	755	49	6879	2417272604406000	0.769095	0.0365425	0.030613
KEGG_PATHWAY	hsa00561:Glycerolipid metabolism	14	0.558882	0.00871567	PNLIPRP1, PNLIPRP2, DGKE, CEL, DGKZ, LIPF, DGKQ, GPAT3, GPAT2, PLPP2, LPIN3, MGLL, PNLIP, DGKH	755	58	6879	2.19927e+16	0.901704	0.056333	0.0471921
KEGG_PATHWAY	hsa04915:Estrogen signaling pathway	20	0.798403	0.010182	KCNJ6, HSP90AA1, CALML5, CALML6, KCNJ9, ADCY4, ITPR1, CALML3, ADCY1, OPRM1, GRM1, ADCY5, PLCB4, CREB3L3, CALM3, CALM1, CALM2, HSPA1B, HSPA1A, KCNJ3	755	99	6879	1.84066e+16	0.933601	0.0642439	0.0538194
KEGG_PATHWAY	hsa04512:ECM-receptor interaction	18	0.718563	0.0122674	COL27A1, COL24A1, GP1BB, LAMA3, COL11A2, ITGA2B, LAMC2, GP6, COMP, VTN, SV2C, RELN, SV2B, ITGA10, COL4A3, CHAD, ITGA8, COL6A6	755	87	6879	1.88509e+16	0.96203	0.0756013	0.0633339
KEGG_PATHWAY	hsa04540:Gap junction	18	0.718563	0.0137064	PRKCG, PRKCB, LPAR1, ADCY4, ITPR1, HTR2C, ADCY1, TUBB4A, TUBA4A, GRM1, ADCY5, GJD2, GRM5, PLCB4, PRKG2, DRD1, DRD2, TUBA8	755	88	6879	1863666465984340	0.974198	0.0816186	0.0683748
KEGG_PATHWAY	hsa00564:Glycerophospholipid metabolism	19	0.758483	0.0138598	CDS1, ACHE, DGKE, CHKB, LPGAT1, PNPLA7, PLA2G4B, PLA2G2A, DGKZ, PISD, ETNPPL, LPCAT4, JMJD7-PLA2G4B, DGKQ, GPAT3, GPAT2, PLPP2, LPIN3, DGKH	755	95	6879	1822251655629130	0.97524	0.0816186	0.0683748
KEGG_PATHWAY	hsa04114:Oocyte meiosis	21	0.838323	0.0167905	CAMK2B, CALML5, CALML6, CAMK2A, ADCY4, PPP2R5B, ITPR1, CALML3, ADCY1, ADCY5, PPP3CA, RPS6KA6, CPEB1, PPP3CB, PPP3R1, CALM3, PGR, CALM1, CPEB3, CALM2, YWHAH	755	111	6879	1.72375e+16	0.988749	0.096728	0.0810325
KEGG_PATHWAY	hsa04918:Thyroid hormone synthesis	15	0.598802	0.0180385	PRKCG, GPX2, PRKCB, ADCY4, ITPR1, ATP1A3, LRP2, ADCY1, ATP1B1, ADCY5, TPO, PLCB4, TG, CREB3L3, IYD	755	70	6879	1.95241e+16	0.991964	0.101706	0.0852029
KEGG_PATHWAY	hsa04360:Axon guidance	23	0.918164	0.0193555	EPHB6, SEMA6B, SEMA4A, EPHA7, EPHA6, UNC5A, SEMA4D, EPHA8, SEMA3G, UNC5C, L1CAM, EFNA5, NFATC4, PPP3CA, PAK1, PPP3CB, PPP3R1, ABLIM2, PAK6, SLIT3, SLIT2, PAK5, NGEF	755	127	6879	1.65007e+16	0.994369	0.106858	0.0895191
KEGG_PATHWAY	hsa04922:Glucagon signaling pathway	19	0.758483	0.0206991	CAMK2B, CALML5, CALML6, CAMK2A, ITPR1, CALML3, PYGM, ACACB, CPT1B, GCK, PPP3CA, PPP3CB, PPP3R1, PLCB4, CREB3L3, CALM3, CALM1, PCK1, CALM2	755	99	6879	1.74863e+16	0.996085	0.111944	0.0937794
KEGG_PATHWAY	hsa04961:Endocrine and other factor-regulated calcium reabsorption	11	0.439122	0.0214056	DNM3, PRKCG, KL, PLCB4, CALB1, PRKCB, TRPV5, ATP1A3, PTH1R, ATP1B1, DNM1	755	45	6879	222719646799117	0.996766	0.11345	0.0950408
KEGG_PATHWAY	hsa04730:Long-term depression	13	0.518962	0.0273936	PRKCG, RYR1, PRKCB, PLA2G4B, ITPR1, CACNA1A, CRHR1, GRM1, PLCB4, JMJD7-PLA2G4B, CRH, PRKG2, NOS1	755	60	6879	1.97411e+16	0.999364	0.142339	0.119243
KEGG_PATHWAY	hsa00250:Alanine, aspartate and glutamate metabolism	9	0.359281	0.0322976	FOLH1, GOT1, GLS2, GAD1, GAD2, RIMKLA, ASPA, ASS1, GLS	755	35	6879	2.34289e+16	0.999833	0.159841	0.133904
KEGG_PATHWAY	hsa00350:Tyrosine metabolism	9	0.359281	0.0322976	PNMT, ALDH1A3, TPO, AOC2, GOT1, HGD, TH, ADH1B, TYRP1	755	35	6879	2.34289e+16	0.999833	0.159841	0.133904
KEGG_PATHWAY	hsa04930:Type II diabetes mellitus	11	0.439122	0.0325713	MAPK9, PKLR, ABCC8, ADIPOQ, CACNA1B, CACNA1A, CACNA1C, PRKCZ, CACNA1E, GCK, CACNA1G	755	48	6879	2087996688741720	0.999845	0.159841	0.133904
KEGG_PATHWAY	hsa01100:Metabolic pathways	153	6107784431137720	0.0367137	PNMT, GALNT12, DGKE, CMAS, AMY2A, HPSE2, GALNT16, AMY2B, OGDHL, ENO2, COX6A2, CNDP1, GLS, LIPF, NDST3, CKMT1B, PTGDS, ATP6V1G2, HGD, AMY1A, AMY1B, GLCE, AMY1C, CEL, MAT1A, COX6B2, UPB1, DGKZ, PISD, FOLH1, DGKQ, PGP, CYP2E1, HPRT1, PLPP2, PNLIP, ACOT4, DGKH, CDS1, ALOX15, AK5, ACACB, AK7, FUT1, ABO, MTMR7, HSD11B1, TPO, INPP5A, CYP11A1, FUT9, INPP5J, ST8SIA5, B4GALNT1, ATP6V0A4, PIP5K1B, RIMKLA, P…	755	1219	6879	1.14358e+16	0.99995	0.176893	0.14819
KEGG_PATHWAY	hsa00330:Arginine and proline metabolism	11	0.439122	0.041966	CKMT2, DAO, GOT1, CKM, ARG1, CKMT1A, CARNS1, CKMT1B, NOS1, PRODH, CNDP1	755	50	6879	2004476821192050	0.999988	0.198589	0.166365
KEGG_PATHWAY	hsa05010:Alzheimer's disease	27	1.07784e+16	0.0430028	NDUFB8, CALML5, CALML6, ATP2A3, ITPR1, CALML3, CACNA1C, CACNA1F, COX7A1, COX6A2, RYR3, PPP3CA, GRIN2A, PPP3CB, PPP3R1, CACNA1S, NOS1, SNCA, MME, COX6B2, GRIN2C, GRIN2B, GRIN1, PLCB4, CALM3, CALM1, CALM2	755	168	6879	1.46431e+16	0.999991	0.199925	0.167484
KEGG_PATHWAY	hsa02010:ABC transporters	10	0.399202	0.0460202	ABCA2, ABCA10, ABCA5, ABCC8, ABCA6, ABCC5, ABCA9, ABCA7, ABCG4, ABCC12	755	44	6879	2.07074e+16	0.999996	0.210265	0.176146
KEGG_PATHWAY	hsa04975:Fat digestion and absorption	9	0.359281	0.0573502	LIPF, PNLIPRP1, PNLIPRP2, CLPS, PLA2G2A, CEL, APOB, PLPP2, PNLIP	755	39	6879	2102598064187460	1	0.25759	0.215792
KEGG_PATHWAY	hsa00220:Arginine biosynthesis	6	0.239521	0.0599814	GOT1, GLS2, ARG1, NOS1, ASS1, GLS	755	20	6879	2733377483443700	1	0.264918	0.221931
KEGG_PATHWAY	hsa00500:Starch and sucrose metabolism	8	0.319361	0.0626686	UGP2, AMY2A, AMY1A, AMY2B, AMY1B, AMY1C, PYGM, GCK	755	33	6879	2.20879e+16	1	0.272249	0.228073
KEGG_PATHWAY	hsa04611:Platelet activation	21	0.838323	0.073056	FGB, FGA, COL27A1, COL24A1, GP1BB, PLA2G4B, COL11A2, FGG, ITGA2B, ADCY4, ITPR1, ADCY1, GP6, RASGRP2, PRKCZ, MAPK13, ADCY5, MAPK11, PLCB4, JMJD7-PLA2G4B, PRKG2	755	130	6879	1.47182e+16	1	0.312256	0.261588
KEGG_PATHWAY	hsa00340:Histidine metabolism	6	0.239521	0.0850482	ALDH1A3, HDC, CARNS1, ASPA, FTCD, CNDP1	755	22	6879	2.48489e+16	1	0.357743	0.299694
KEGG_PATHWAY	hsa04530:Tight junction	15	0.598802	0.0901444	MYH7B, CGN, PRKCZ, CLDN6, MYH1, CLDN10, MYH2, CLDN3, PPP2R2C, CLDN9, MYL2, CLDN18, MYH11, CLDN16, TJP3	755	87	6879	1.57091e+16	1	0.373254	0.312688
KEGG_PATHWAY	hsa04964:Proximal tubule bicarbonate reclamation	6	0.239521	0.0993457	MDH1, GLS2, ATP1A3, ATP1B1, PCK1, GLS	755	23	6879	2376849985603220	1	0.405025	0.339304
